# Estimating the last day for COVID-19 outbreak in mainland China

QUENTIN GRIETTE<sup>(a)</sup>, ZHIHUA LIU<sup>(b)</sup> AND PIERRE MAGAL<sup>(a)\*</sup>

<sup>(a)</sup> *Univ. Bordeaux, IMB, UMR 5251, F-33400 Talence, France.*

*CNRS, IMB, UMR 5251, F-33400 Talence, France.*

<sup>(b)</sup> *School of Mathematical Sciences, Beijing Normal University, Beijing 100875, People's Republic of China*

April 14, 2020

## 1 Abstract

Our main aim is to estimate the last day for COVID-19 outbreak in mainland China. We developed mathematical models to predict reasonable bounds on the date of end of the COVID-19 epidemics in mainland China with strong quarantine and testing measures for a sufficiently long time. We used reported data in China from January 20, 2020 to April 9, 2020. We firstly used a deterministic approach to obtain a formula to compute the probability distribution of the extinction date by combining the models and continuous-time Markov processes. Then we present the individual based model (IMB) simulations to compare the result by deterministic approach and show the absolute difference between the estimated cumulative probability distribution computed by simulations and formula. We provide the predictions of the last day of epidemic for different fractions  $f$  of asymptomatic infectious that become reported symptomatic infectious.

**Keywords:** COVID-19 epidemic; epidemic mathematical model; mainland China; the last day; reported and unreported cases; control measures.

## 2 Key points:

- We conducted a study of the last day for COVID-19 outbreak in mainland China. By using a deterministic approach, we obtain a formula to compute the probability distribution of the extinction date.
- We estimated the probability distribution of the extinction date by individual-based stochastic simulations and compared the results from two methods (simulations and formula).
- Stochastic simulations were used to precisely estimate the cumulative probability distribution of the date of end of the epidemic.
- We predict the last day of epidemic for different fractions  $f$  of asymptomatic infectious that become reported symptomatic infectious.

## 3 Introduction

During the outbreak of COVID-19 in China, the government imposed strong intervention measures such as enhanced epidemiological surveys and surveillance, contact tracing, isolation, quarantine. COVID-19 was brought under control in mainland China with these strong measures. Since March 12, the number of daily reported cases imported from mainland China has been kept within 5 for several weeks in mainland China. One of the most concerned issues now is the duration of the epidemic of

**NOTE: This preprint reports new research that has not been certified by peer review and should not be used to guide clinical practice.**

\*Corresponding authors.

COVID-19 in mainland China. However, there are several challenges to such analysis. COVID-19 can be contagious during the incubation period. The fraction of asymptomatic infectious cases and unreported cases (with mild symptom) and their contagiousness are of major importance in understanding the evolution of COVID-19 epidemic, and involves great difficulty in their estimation.

As coronavirus outbreaks surge worldwide, more and more facts [11] show that many new patients which are asymptomatic or have only mild symptoms can transmit the virus. Researches both in [12] and [4] have confirmed that asymptomatic transmission occurs. It has been shown in [14] that some new crown pneumonia patients had higher viral levels in the throat swabs during the early stage of the disease. [10] reported that 13 evacuees from Wuhan, China on chartered flights were infected, of whom 4, never developed symptoms and the estimated asymptomatic proportion in [3] is at 17.9%. A team in China [13] suggests that by February 18, there were 37,400 people with the virus in Wuhan whom authorities didn't know about. Research in [5] estimates 86% of all infections were undocumented (95% CI: [82%-90%]) prior to January 23, 2020 travel restrictions. The transmission rate of undocumented infections was 55% of documented infections ([46%-62%]). Due to their greater numbers, undocumented infections were the infection source for 79% of documented cases. The asymptomatic and mild symptomatic cases were missed because authorities aren't doing enough testing, or 'preclinical cases' in which people are incubating the virus but would not be ill enough to seek medical help, would probably slip past screening methods such as temperature checks. The asymptomatic and unreported cases are just going to be really critical for explaining the rapid geographic spread of COVID-19 and indicate containment of this virus will be particularly challenging.

In previous works [6, 7, 8], our team has developed differential equations models of COVID-19 epidemics to predict forward in time the future number of cases from early reported case data in regions throughout the world. Our models of the COVID-19 epidemic incorporate the key features of this epidemic: (1) the importance of the timing and magnitude of the implementation of major government public restrictions designed to mitigate the severity of the epidemic; (2) the importance of asymptomatic infectious, reported (with sever symptom) and unreported (with mild symptom) cases in interpreting the number of reported cases. This article is devoted to the duration of the epidemic of COVID-19 in mainland China. The duration of the stochastic epidemic has been considered in the 70th by Barbour [1]. We refer Britton and Pardoux [2] for more results about stochastic epidemic models. Our goal in the present paper is to investigate the duration of the epidemic of COVID-19 in mainland China in function of the fraction of unreported cases.

## 4 Method

### 4.1 Data

We use the cumulative data of the reported cases confirmed by testing in mainland China from January 20, 2020 to March 18, 2020, taken from the National Health Commission of the People's Republic of China and Chinese center for disease control and prevention [15, 16]. We should note the following fact: Before February 11, the cumulative data of the reported cases was confirmed by testing. From February 11, the cumulative data included cases that were not tested for the virus, but were clinically diagnosed based on medical imaging. The cumulative data from February 10 to February 15 specified both types of reported cases. But from February 16, the data did not separate the two types of reporting, but reported the sum of both types which makes it impossible for us to know the number of cases tested. There were total 17,409 clinically diagnosed cases from February 10 to February 15. We subtracted 17,409 cases from the cumulative reported cases after February 15 to obtain the approximate data by testing only after February 15 as shown in Table 1 with this adjustment. Note that on January 23<sup>rd</sup> 2020 mainland China started the lock-down of Wuhan city, and implemented other interventions soon on other Chinese cities.

### 4.2 The model

The model consists of the following system of ordinary differential equations:

$$\begin{cases} S'(t) = -\tau(t)S(t)[I(t) + U(t)], \\ I'(t) = \tau(t)S(t)[I(t) + U(t)] - \nu I(t), \\ R'(t) = \nu_1 I(t) - \eta R(t), \\ U'(t) = \nu_2 I(t) - \eta U(t), \end{cases} \quad (4.1)$$

with initial data

$$S(t_0) = S_0 > 0, I(t_0) = I_0 > 0, R(t_0) = R_0 \geq 0 \text{ and } U(t_0) = U_0 \geq 0. \quad (4.2)$$

Here  $t \geq t_0$  is time in days,  $t_0$  is the beginning date of the model of the epidemic,  $S(t)$  is the number of individuals susceptible to infection at time  $t$ ,  $I(t)$  is the number of asymptomatic infectious individuals at time  $t$ ,  $R(t)$  is the number of reported symptomatic infectious individuals at time  $t$ , and  $U(t)$  is the number of unreported symptomatic infectious individuals at time  $t$ . The parameters and initial conditions of the model are given in Table 2 and a flow diagram of the model is given in Figure 1.

The transmission rate at time  $t$  is  $\tau(t)$ . Asymptomatic infectious individuals  $I(t)$  are infectious for an average period of  $1/\nu$  days. Reported symptomatic individuals  $R(t)$  are infectious for an average period of  $1/\eta$  days, as are unreported symptomatic individuals  $U(t)$ . We assume that reported symptomatic infectious individuals  $R(t)$  are reported and isolated immediately, and cause no further infections. The asymptomatic individuals  $I(t)$  can also be viewed as having a low-level symptomatic state. All infections are acquired from either  $I(t)$  or  $U(t)$  individuals. The fraction  $f$  of asymptomatic infectious become reported symptomatic infectious, and the fraction  $1 - f$  become unreported symptomatic infectious. The rate asymptomatic infectious become reported symptomatic is  $\nu_1 = f\nu$ , the rate asymptomatic infectious become unreported symptomatic is  $\nu_2 = (1 - f)\nu$ , where  $\nu_1 + \nu_2 = \nu$ .

During the exponential growth phase  $\tau(t) \equiv \tau_0$  is constant. We then use a time-dependent decreasing transmission rate  $\tau(t)$  to incorporate the effects of the strong measures taken by the authorities to control the epidemics (confinement, contact tracing, etc...). The formula for  $\tau(t)$  is

$$\begin{cases} \tau(t) = \tau_0, 0 \leq t \leq N, \\ \tau(t) = \tau_0 \exp(-\mu(t - N)), N < t. \end{cases} \quad (4.3)$$

The date  $N$  and the value of  $\mu$  are chosen so that the cumulative reported cases in the numerical simulation of the epidemic aligns with the cumulative reported case data after day  $N$ , when the public measures take effect. In this way we are able to project forward the time-path of the epidemic after the government-imposed public restrictions take effect.

The cumulative number of reported cases at time  $t$  is given by the formula

$$CR(t) = \nu_1 \int_{t_0}^t I(\sigma) d\sigma, \text{ for } t \geq t_0, \quad (4.4)$$

and the cumulative number of unreported at time  $t$  is given by the formula

$$CU(t) = \nu_2 \int_{t_0}^t I(\sigma) d\sigma, \text{ for } t \geq t_0. \quad (4.5)$$

The daily number of reported cases from the model can be obtained by computing the solution of the following equation:

$$DR'(t) = \nu f I(t) - DR(t), \text{ for } t \geq t_0 \text{ and } DR(t_0) = DR_0. \quad (4.6)$$

### 4.3 Method to estimate the parameters and initial values of the model

The actual value of  $f$  is unknown. Because of the strong isolation and testing measures in China, it seems reasonable to take  $f = 0.8$  which means that 80% of symptomatic infectious cases go reported. We will however test different values 0.2, 0.4, 0.6, 0.8 of  $f$ . We assume  $\eta = 1/7$ , which means that the average period of infectiousness of both unreported symptomatic infectious individuals and reported symptomatic infectious individuals is 7 days. We assume  $\nu = 1/7$ , which means that the average period of infectiousness of asymptomatic infectious individuals is 7 days. These values can be modified as further epidemiological information becomes known.

For the exponential growth of reported cumulative cases  $CR(t)$  of the COVID-19 epidemic, we propose a formula:

$$CR(t) = \chi_1 \exp(\chi_2 t) - \chi_3, t \geq t_0. \quad (4.7)$$

We fix the value of  $\chi_3$ . The values of  $\chi_1$  and  $\chi_2$  are fitted to the cumulative reported case data in the exponential growth phase of the epidemic (i.e. we use an exponential fit  $\chi_1 \exp(\chi_2 t)$  to fit the data  $CR(t) + 1$ ). We assume that the initial value  $S_0$  corresponds to the population of the region of the

reported case data. The value of the susceptible population  $S(t)$  is assumed to be only slightly changed by the removal of the number of people infected in the beginning of the exponential growth phase. The following formulas for  $I_0$ ,  $U_0$ ,  $t_0$ ,  $\tau_0$ , and  $\mathcal{R}_0$  were derived in [6]. Their numerical values are identified by using (4.8) from the exponential growth phase of the epidemic. The other initial conditions are

$$I_0 = \frac{\chi_2}{f(\nu_1 + \nu_2)}, \quad U_0 = \left( \frac{(1-f)(\nu_1 + \nu_2)}{\eta + \chi_2} \right) I_0, \quad R_0 = 0. \quad (4.8)$$

**Remark 4.1** *It follows that*

$$\frac{R(t)}{U(t)} = \frac{f}{1-f}, \quad \forall t \geq t_0.$$

The value of the transmission rate  $\tau(t)$ , during the exponential growth of the epidemic is the constant value

$$\tau_0 = \left( \frac{\chi_2 + \nu_1 + \nu_2}{S_0} \right) \left( \frac{\eta + \chi_2}{\nu_2 + \eta + \chi_2} \right). \quad (4.9)$$

The model starting time of the epidemic is

$$t_0 = \frac{1}{\chi_2} \left( \log(\chi_3) - \log(\chi_1) \right). \quad (4.10)$$

The value of the basic reproductive number is

$$\mathcal{R}_0 = \left( \frac{\tau_0 S_0}{\nu_1 + \nu_2} \right) \left( 1 + \frac{\nu_2}{\eta} \right). \quad (4.11)$$

## 5 Result

### 5.1 Derivation of a formula to compute the last day the outbreak

In order to estimate the parameters and initial values of the model, we firstly fix the value  $\chi_3 = 30$ . The values of  $\chi_1$  and  $\chi_2$  in  $\chi_1 \exp(\chi_2 t) - \chi_3$  are fitted to the cumulative reported case data from January 19 to January 26 in Table 1 for mainland China when it is recognized that  $CR(t)$  is growing exponentially. The values of the parameter  $\tau_0$  and initial conditions  $I_0$ ,  $U_0$ ,  $R_0$ , and  $t_0$  are obtained by using formula (4.8)-(4.10). We summarize all the results when  $f$  takes different values 0.2, 0.4, 0.6, 0.8 in Table 3.

Using the mathematical model (4.1) with parameters and initial values in Table 3, we project the future daily data of reported cases and cumulative data of cases, both reported and unreported for mainland China. In Figures 4 and 5, we present the comparison of the model with the cumulative and daily data for mainland China, respectively.

The transmission  $\tau(t)$  is decreasing exponentially fast for  $t > N$ . Therefore, if we choose a day  $t_1$  (sufficiently long after the turning point the quantity  $\tau(t)S(t) \leq \tau(t)S_0$  is small enough) so we can use the approximation

$$I'(t) \simeq -\nu I(t).$$

for  $I$ -equation in system (4.1). This means that the flux of newly infectious can be neglected after the day  $t_1$ . We illustrate  $S_0 \tau(t)$  in Figure 2 for a typical case.

If we assume that this approximation does not influence significantly the number of infectious after the day  $t_1$ , we can take  $\tau(t) = 0$  in the original model (4.1) and for  $t \geq t_1$  the resulting system is the following

$$\begin{cases} I'(t) = -\nu I(t), \\ R'(t) = \nu_1 I(t) - \eta R(t), \\ U'(t) = \nu_2 I(t) - \eta U(t). \end{cases} \quad (5.1)$$

This system is supplemented by the initial data

$$I(t_1) = I_1, U(t_1) = U_1 \text{ and } R(t_1) = R_1. \quad (5.2)$$

where  $I_1$ ,  $U_1$  and  $R_1$  are the values of the solutions of the original system (4.1)-(4.2) on day  $t_1$ . The flux diagram of model (5.1) is described in Figure 3.

In Figure 6 we represent the error between the solution of (4.1) and the solution of (5.1) for  $t > t_1$  by computing the error as follows.

$$\text{err}(t_1) = \sup_{t \geq t_1} \max (|I(t) - I_1(t)|, |U(t) - U_1(t)|), \quad (5.3)$$

where  $I(t)$  and  $U(t)$  are solution of system (4.1) and  $I_1(t)$  and  $U_1(t)$  are solution of system (4.4). This error formula does not involve the component  $R(t)$  for reported cases, because this component is supposed to be known.

In Section 7, we use model (5.1) to compute the probability that no  $I$ -individual (no asymptomatic infectious) and no  $U$ -individual (symptomatic unreported) are left after the day  $t$ . We obtain that there are no more unreported case after the day  $t$  with the probability

$$\mathbb{P}(I(s) + U(s) = 0 \text{ for } s \geq t | I(t_1) = I_1, U(t_1) = U_1) \\ = \left(1 - e^{-\eta(t-t_1)}\right)^{U_1} \times \left(1 - e^{-\nu(t-t_1)} - (1-f)\nu(t-t_1)e^{-\eta(t-t_1)}\right)^{I_1}. \quad (5.4)$$

Formula (5.4) allows us to compute the probability of the date of extinction according to the values of  $I(t_1)$  and  $U(t_1)$  for different  $t_1$  when  $\eta = \nu$ .  $(I(t_1), U(t_1))$  is the value of the solution of (4.1) at  $t_1$  with the parameters and initial values taken from Table 3. We show the results in Figure 7. Observe that, as  $t_1$  increases, the probability distribution of the date of extinction seems to converge to a limit profile.

Furthermore, we could also compute 90%, 95% and 99% probability of the date of extinction for different values of  $f$  by formula (5.4) when  $\eta = \nu$ . In fact, the parameters and initial values in model (4.1) were taken from Table 3 for each value of  $f$ . Then we compute the values of  $I(t_1)$  and  $U(t_1)$  for different values of  $t_1$  which is the value of the solution of (4.1) at  $t_1$ . Thus we could compute 90%, 95% and 99% probability of the date of extinction according to the values of  $I(t_1)$  and  $U(t_1)$  for different values of  $t_1$  which was summarized in Figure 8.

## 5.2 Stochastic simulations of (4.1) and comparison with (5.4)

To get insight on the variability caused by the randomness of the epidemiological transitions (transmission of the disease due to a contact between an infected and a susceptible, development of symptoms, recovery or death) we developed an individual based model (IMB) in which those epidemiological transitions are modeled by random variables following exponential laws, as described in the flowchart (Figure 3). The interest of these simulations is mostly twofold:

- To estimate the evolution of the epidemic when the accurate number of each class of infected is known. In practice we estimate those numbers by using the deterministic model (4.1) using the available data.
- To give numerical estimates of the cumulative probability distribution of the date of end of the epidemic, without the assumption that  $\tau = 0$  used in equation (4.1).

In Figure 9, we plot the cumulative distribution for the probability extinction of the epidemic of COVID-19 obtained by the individual-based simulations. The parameter  $t_1$  in Figure 9 is the date at which the stochastic simulations are started; the precise initial condition is the solution to (4.1) at time  $t_1$ . In other words we follow the deterministic model (4.1) up to the date  $t_1$ , then start the stochastic simulations.

The fact that all curves seem to be superimposed with one another indicates that the cumulative probability distribution of the extinction date does not depend on the starting point of the simulations. We also observe that the unique distribution given by the individual-based simulations coincides with the limiting profile for the cumulative distribution in Figure 7. This validates our assumption that  $\tau(t)$  can be identified to 0 to compute the cumulative distribution of the extinction date when  $t_1$  is chosen sufficiently large. We infer from Figure 7 that this approximation is acceptable when  $t_1$  is larger than Feb. 17.

To be more precise on the relevance of the approximation formula (5.4), we computed the absolute value of the difference between the cumulative distribution of the extinction date given by (5.4) and the one given by stochastic simulations in Table 4. More precisely, we computed the quantity

$$\text{diff}(t_1) = \sup_{t \geq t_1} |f_{IMB}(t) - f_{\text{formula}}(t)| \quad (5.5)$$

for each  $t_1$  presented in Figures 7 and 9, where  $f_{IBM}$  is the cumulative distribution computed by stochastic simulations (Figure 9) and  $f_{\text{formula}}$  is the cumulative distribution given by (5.4) (Figure 7).

Finally, we compared the results of the individual based model simulations starting from the to the result of the model (4.1). The plots of the average value over our individual-based simulations compared to the corresponding component of the model (4.1) are presented in Figure 10. In Figure 11 we present a representation of the average and standard deviation of the populations computed by the individual-based simulations. Note however that the high variability observed is largely due to the small size of the initial population at  $t_0$ . In Table 6 we show that this variability diminishes when the starting time of the stochastic simulations increases.

## 6 Discussion

In this study we mixed the deterministic approach, which correctly describes the initial and intermediate phases of the epidemics, with individual-based models which give estimates on the real extinction date of the epidemics. In Table 7 we summarize our findings for  $f = 0.8, 0.6, 0.4$  and  $0.2$ . From this table we deduce that the larger  $f$  is the earlier the epidemic will stop. Therefore it is very important to increase as much as possible the value of  $f$  in order to reduce the duration of the epidemic of COVID-19 in mainland China.

We developed a mathematical framework to predict reasonable bounds on the date of end of the COVID-19 epidemics in mainland China, provided quarantine and confinement measures are maintained with sufficient strength. In particular, the day at which confinement was eased is nowhere near any reasonable bound for the extinction date. Therefore, a secondary outbreak in mainland China is not to be discarded: there is a high probability that there still exists a significant number of unreported infected individuals in the population.

Many parameters are still unknown concerning the future behavior of the pandemics. For what concerns mainland China, if the remaining hidden number of infected individuals can be estimated by our models, the transmission rate after the end of the confinement measures remains unknown. Indeed, it is reasonable to expect that sociological phenomena like the awareness of the danger have a strong impact on this quantity, because people will tend to avoid risky behavior. There is a strong incentive to identify quantitatively this transmission rate after the end of confinement measures, as we believe that this parameter is crucial to determine whether the epidemic will potentially start again or not. This issue will be addressed in a forthcoming paper.

In this article we computed the end day of the epidemic by neglecting the fact that Chinese people went back to work. Here we basically assume that the new distancing measures were good enough to avoid new case after the end of February. Actually people in China went back to work gradually starting from February 10th and until now the school and university are still closed. This kind issues can lead to new developments and are left for future work.

## 7 Supplementary

### 7.1 Formula to compute the probability distribution of the extinction date

We use continuous-time Markov processes to compute the exact distribution of the date of end of the epidemic after the transmission rate is effectively taken as zero. We start on  $t_1$  with initial values  $I_1, U_1$ , and  $R_1$  for  $I$ -individuals,  $U$ -individuals and  $R$ -individuals, respectively. The evolution of each individual is guided by independent exponential processes, and we have the following:

- (i) Each individual  $I$  will change state following an exponential clock of rate  $\nu$ . When  $I$  changes its state, it will be transferred to the class of  $R$ -individuals with probability  $f$  and to the class of  $U$ -individuals with probability  $(1 - f)$ ;
- (ii) Each individual in the state  $U$  will change state following an exponential clock with rate  $\eta$  and become removed individual;
- (iii) Each individual in the state  $R$  will change state following an exponential clock with rate  $\eta$  and become removed individual



Since the class  $I$  has only outgoing fluxes, the law of extinction for the  $I$ -individuals is

$$\mathbb{P}(I(t) = 0 | I(t_1) = I_1) = \left( \int_{t_1}^t \nu e^{-\nu(s-t_1)} ds \right)^{I_1} = \left( 1 - e^{-\nu(t-t_1)} \right)^{I_1},$$

and the probability to have some  $I$ -individual left at time  $t$  is

$$\mathbb{P}(I(t) = I | I(t_1) = I_1) = (1 - e^{-\nu(t-t_1)})^{I_1-I} e^{-\nu I(t-t_1)}.$$

For the  $U$ -individuals and the  $R$ -individuals, the situation is more intricate. Indeed, the  $U$ -individuals and the  $R$ -individuals vanish at a constant rate  $\eta$  but new individuals appear from the  $I$  class at rate  $(1-f)\nu$  and  $f\nu$ , respectively, depending on the remaining stock of  $I$ . Therefore the probability that  $U$  gets extinct before  $t$  also depends on the number of remaining  $I$ . It is actually easier to compute directly the extinction property for the sum  $I + U$ , which is our aim anyways.

When  $\nu \neq \eta$ , we obtain

$$\begin{aligned} \mathbb{P}(I(s) + U(s) = 0 \forall s \geq t | I(t_1) = I_1, U(t_1) = U_1) \\ &= \left( 1 - e^{-\eta(t-t_1)} \right)^{U_1} \times \left( \int_{t_1}^t \mathbb{P}(U \rightarrow RR \text{ before } t | I \rightarrow U \text{ at } s) \mathbb{P}(I \rightarrow U \text{ at } s) + \mathbb{P}(I \rightarrow R \text{ at } s) ds \right)^{I_1} \\ &= \left( 1 - e^{-\eta(t-t_1)} \right)^{U_1} \times \left( \int_{t_1}^t \left( 1 - e^{-\eta(t-s)} \right) \times \left( (1-f)\nu e^{-\nu(s-t_1)} + f\nu e^{-\nu(s-t_1)} \right) ds \right)^{I_1} \\ &= \left( 1 - e^{-\eta(t-t_1)} \right)^{U_1} \times \left( (1-f) \left( 1 - e^{-\nu(t-t_1)} - \nu \frac{e^{-\nu(t-t_1)} - e^{-\eta(t-t_1)}}{\eta - \nu} \right) + f(1 - e^{-\nu(t-t_1)}) \right)^{I_1} \\ &= \left( 1 - e^{-\eta(t-t_1)} \right)^{U_1} \times \left( 1 - e^{-\nu(t-t_1)} - (1-f)\nu \frac{e^{-\nu(t-t_1)} - e^{-\eta(t-t_1)}}{\eta - \nu} \right)^{I_1}, \end{aligned}$$

where the  $RR$ -individuals are the removed individuals.

Similarly when  $\eta = \nu$ , we obtain

$$\begin{aligned} \mathbb{P}(I(s) + U(s) = 0 \forall s \geq t | I(t_1) = I_1, U(t_1) = U_1) \\ &= \left( 1 - e^{-\eta(t-t_1)} \right)^{U_1} \times \left( 1 - e^{-\nu(t-t_1)} - (1-f)\nu(t-t_1)e^{-\eta(t-t_1)} \right)^{I_1}. \end{aligned} \quad (7.1)$$

## 7.2 Cumulative distribution of the date of end of the epidemic

The stochastic simulations introduced in section 5.2 can be used, in particular, to precisely estimate the cumulative probability distribution of the date of end of the epidemic, defined as the last time at which the quantity  $I + U$  is positive.

In order to get a measure of the precision we remark that the values taken by the cumulative probability distribution  $f(t)$  can be estimated by the average of independent measures of the random variable

$$X = \mathbb{1}_{t_{ext} \leq t},$$

which follows an Bernouilli distribution of parameter  $f(t)$ . Consecutive runs of the individual-based simulations yield independent observations  $X_n$  of this distribution. By Hoeffding's inequality we have for all  $\varepsilon > 0$  and  $n \in \mathbb{N}$

$$\mathbb{P} \left( \left| \frac{1}{n} \sum_{i=1}^n X_n - f(t) \right| \geq \varepsilon \right) \leq 2 \exp(-2\varepsilon^2 n) =: \alpha,$$

and we achieved an error of at most  $\varepsilon = 10^{-3}$  at risk  $\alpha \leq 10^{-3}$  by running  $n = -\frac{2}{\varepsilon^2} \ln(\frac{\alpha}{2}) \approx 15201805$  independent individual-based simulations to estimate the probability distribution of the extinction time (Figure 9,  $t_1 = 82$  *i.e.* March 23). Other curves are estimated on the basis of 152019 independent simulations, which amounts to an error of at most  $10^{-2}$  at risk  $10^{-3}$ .

Since the curves presented in Figure 7 are so similar that it is difficult to see any difference between them, we computed the absolute error between each curve and the ‘‘reference’’ of  $t_1 = 82$ . We present the numerical values in Table 5. Notice that the error is actually below the estimated precision of the approximation.

## 8 Tables

| January       |               |               |               |               |               |               |
|---------------|---------------|---------------|---------------|---------------|---------------|---------------|
| 19            | 20            | 21            | 22            | 23            | 24            | 25            |
| 198           | 291           | 440           | 571           | 830           | 1287          | 1975          |
| 26            | 27            | 28            | 29            | 30            | 31            |               |
| 2744          | 4515          | 5974          | 7711          | 9692          | 11791         |               |
| February      |               |               |               |               |               |               |
| 1             | 2             | 3             | 4             | 5             | 6             | 7             |
| 14380         | 17205         | 20438         | 24324         | 28018         | 31161         | 34546         |
| 8             | 9             | 10            | 11            | 12            | 13            | 14            |
| 37198         | 40171         | 42638         | 44653         | 46472         | 48467         | 49970         |
| 15            | 16            | 17            | 18            | 19            | 20            | 21            |
| 51091         | 70548 – 17409 | 72436 – 17409 | 74185 – 17409 | 75002 – 17409 | 75891 – 17409 | 76288 – 17409 |
| 22            | 23            | 24            | 25            | 26            | 27            | 28            |
| 76936 – 17409 | 77150 – 17409 | 77658 – 17409 | 78064 – 17409 | 78497 – 17409 | 78824 – 17409 | 79251 – 17409 |
| 29            |               |               |               |               |               |               |
| 79824 – 17409 |               |               |               |               |               |               |
| March         |               |               |               |               |               |               |
| 1             | 2             | 3             | 4             | 5             | 6             | 7             |
| 79824 – 17409 | 79824 – 17409 | 79824 – 17409 | 80409 – 17409 | 80552 – 17409 | 80651 – 17409 | 80695 – 17409 |
| 8             | 9             | 10            | 11            | 12            | 13            | 14            |
| 80735 – 17409 | 80754 – 17409 | 80778 – 17409 | 80793 – 17409 | 80813 – 17409 | 80824 – 17409 | 80844 – 17409 |
| 15            | 16            | 17            | 18            |               |               |               |
| 80860 – 17409 | 80881 – 17409 | 80894 – 17409 | 80928 – 17409 |               |               |               |

Table 1: cumulative data of reported cases confirmed by testing from January 20, 2020 to March 18, 2020, reported for mainland China.

| Symbol             | Interpretation                                                                  | Method |
|--------------------|---------------------------------------------------------------------------------|--------|
| $t_0$              | Time at which the epidemic started                                              | fitted |
| $S_0$              | Number of susceptible at time $t_0$                                             | fixed  |
| $I_0$              | Number of asymptomatic infectious at time $t_0$                                 | fitted |
| $U_0$              | Number of unreported symptomatic infectious at time $t_0$                       | fitted |
| $\tau(t)$          | Transmission rate at time $t$                                                   | fitted |
| $1/\nu$            | Average time during which asymptomatic infectious are asymptomatic              | fixed  |
| $f$                | Fraction of asymptomatic infectious that become reported symptomatic infectious | fixed  |
| $\nu_1 = f\nu$     | Rate at which asymptomatic infectious become reported symptomatic               | fitted |
| $\nu_2 = (1-f)\nu$ | Rate at which asymptomatic infectious become unreported symptomatic             | fitted |
| $1/\eta$           | Average time symptomatic infectious have symptoms                               | fixed  |

Table 2: Parameters and initial conditions of the model.

| $\chi_1$ | $\chi_2$ | $\chi_3$ | $t_0$   | $f$ | $\mu$  | $N$     | $I_0$    | $U_0$   | $S_0$                 | $\tau_0$                 |
|----------|----------|----------|---------|-----|--------|---------|----------|---------|-----------------------|--------------------------|
| 0.2601   | 0.3553   | 30       | 13.3617 | 0.8 | 0.1480 | Jan. 26 | 93.2785  | 5.3494  | $1.40005 \times 10^9$ | $3.3655 \times 10^{-10}$ |
| 0.2601   | 0.3553   | 30       | 13.3617 | 0.6 | 0.1531 | Jan. 26 | 124.3550 | 14.2646 | $1.40005 \times 10^9$ | $3.1920 \times 10^{-10}$ |
| 0.2601   | 0.3553   | 30       | 13.3617 | 0.4 | 0.1574 | Jan. 26 | 186.5325 | 32.0953 | $1.40005 \times 10^9$ | $3.0358 \times 10^{-10}$ |
| 0.2601   | 0.3553   | 30       | 13.3617 | 0.2 | 0.1612 | Jan. 26 | 373.0650 | 85.5875 | $1.40005 \times 10^9$ | $2.8942 \times 10^{-10}$ |

Table 3: The parameters  $\chi_1, \chi_2, \chi_3$  are estimated by using the data in Table 1 to fit  $\chi_1 \exp(\chi_2 t) - \chi_3$  to the data  $CR(t)$  between the following periods January 19 to January 26 for mainland China. The values of  $I_0, U_0, \tau_0$ , and  $t_0$  are obtained by using formula (4.8)-(4.10). Here we take  $\chi_3 = 30$  in order to obtain non-zero integer approximation for  $I_0, U_0$ .



|               |                      |                      |                      |                      |                      |                      |
|---------------|----------------------|----------------------|----------------------|----------------------|----------------------|----------------------|
| $t_1$         | 26                   | 33                   | 40                   | 47                   | 54                   | 61                   |
| date          | Jan. 27              | Feb. 3               | Feb. 10              | Feb. 17              | Feb. 24              | Mar. 2               |
| diff( $t_1$ ) | $8.6 \times 10^{-1}$ | $4.4 \times 10^{-1}$ | $1.7 \times 10^{-1}$ | $6.4 \times 10^{-2}$ | $2.5 \times 10^{-2}$ | $8.1 \times 10^{-3}$ |
| $t_1$         | 68                   | 75                   | 82                   |                      |                      |                      |
| date          | Mar. 9               | Mar. 16              | Mar. 23              |                      |                      |                      |
| diff( $t_1$ ) | $3.5 \times 10^{-3}$ | $8.5 \times 10^{-4}$ | $5.7 \times 10^{-4}$ |                      |                      |                      |

Table 4: Absolute difference between the cumulative distribution given by the stochastic simulations and the approximation (5.1). For each  $t_1$  we computed the cumulative distributions with a risk  $10^{-3}$  of an error greater than  $10^{-2}$ , starting from an initial condition given at  $t = t_1$ . This corresponds to a total of  $n = 152019$  independent simulations for each set of initial conditions. For each  $t_1$ , the initial condition was computed by rounding the solution to (4.1) at  $t = t_1$  to the nearest integer.

|               |                      |                      |                      |                      |                      |                      |
|---------------|----------------------|----------------------|----------------------|----------------------|----------------------|----------------------|
| $t_1$         | 26                   | 33                   | 40                   | 47                   | 54                   | 61                   |
| date          | Jan. 27              | Feb. 3               | Feb. 10              | Feb. 17              | Feb. 24              | Mar. 2               |
| diff( $t_1$ ) | $2.9 \times 10^{-3}$ | $2.1 \times 10^{-3}$ | $2.9 \times 10^{-3}$ | $1.8 \times 10^{-3}$ | $2.5 \times 10^{-3}$ | $1.4 \times 10^{-3}$ |
| $t_1$         | 68                   | 75                   | 82                   |                      |                      |                      |
| date          | Mar. 9               | Mar. 16              | Mar. 23              |                      |                      |                      |
| diff( $t_1$ ) | $1.6 \times 10^{-3}$ | $1.2 \times 10^{-3}$ | 0.00                 |                      |                      |                      |

Table 5: Absolute difference between the cumulative distribution given by the stochastic simulations and the reference simulation  $t_1 = 82$ . For each  $t_1$  we computed the error as  $\text{diff}(t_1) = \sup_{t \geq t_1} |f_{t_1}(t) - f_{81}(t)|$ , where  $f_{t_1}$  is the estimated distribution computed simulations, for which the initial condition correspond to the components of (4.1) at  $t = t_1$  rounded to the closest integer.

|                               |         |         |         |         |        |        |
|-------------------------------|---------|---------|---------|---------|--------|--------|
| $t_1$                         | $t_0$   | 18      | 22      | 26      | 33     | 40     |
| date                          | Jan. 14 | Jan. 19 | Jan. 23 | Jan. 27 | Feb. 3 | Feb.10 |
| $\max_{t \geq t_1} \sigma(t)$ | 3717    | 1685    | 787     | 401     | 186    | 106    |

Table 6: Maximal standard deviation for the components  $I$ ,  $R$  and  $U$  computed by stochastic simulations started at date  $t_1$  with initial condition given by the solution to (4.1) with the parameters from Table 3. The ODE model (4.1) is solved up to  $t = t_1$ , and we take the solution to (4.1) at  $t = t_1$  as initial condition for the stochastic simulations.  $\sigma(t)$  is the maximum, at time  $t$ , of the standard deviations of the quantities  $I(t)$ ,  $R(t)$  and  $U(t)$  in a sample of  $n = 1000$  independent simulations started at  $t = t_1$ , and is expressed in number of individuals. We took  $f = 0.8$  and other parameters are taken from Table 3.

|                               | Level of risk | 10%    | 5%      | 1%      |
|-------------------------------|---------------|--------|---------|---------|
| Extinction date ( $f = 0.8$ ) |               | May 19 | May 24  | June 5  |
| Extinction date ( $f = 0.6$ ) |               | May 25 | May 31  | June 12 |
| Extinction date ( $f = 0.4$ ) |               | May 31 | June 5  | June 17 |
| Extinction date ( $f = 0.2$ ) |               | June 7 | June 12 | June 24 |

Table 7: In this table we record the last day of epidemic obtained from Figure 8 by fixing  $t_1$  to March 16.

### Author contributions

Q.G., Z.L. and P.M. conceived and designed the study. Q.G. and P.M. analyzed the data, carried out the analysis and performed numerical simulations, Z.L. and P.M. conducted the literature review. All authors participated in writing and reviewing of the manuscript.

## Acknowledgement

The computations presented in this paper were carried out using the PlaFRIM experimental testbed, supported by Inria, CNRS (LABRI and IMB), Université de Bordeaux, Bordeaux INP and Conseil Régional d'Aquitaine (see <https://www.plafrim.fr/>).

**Funding:** This research was funded by the National Natural Science Foundation of China (grant number: 11871007 (ZL)), NSFC and CNRS (Grant number: 11811530272 (ZL, PM)) and the Fundamental Research Funds for the Central Universities (ZL).

**Conflicts of Interest:** The authors declare no conflict of interest.

## References

- [1] A. D. Barbour, The duration of the closed stochastic epidemic, *Biometrika*, **62(2)** (1975), 477-482.
- [2] T. Britton and E. Pardoux, *Stochastic Epidemic Models with Inference*, Springer (2019).
- [3] K. Mizumoto, K. Kagaya, A. Zarebski and G. Chowell, Estimating the asymptomatic proportion of coronavirus disease 2019 (COVID-19) cases on board the Diamond Princess cruise ship, Yokohama, Japan, 2020. *Euro Surveill.* **25(10)** (2020). <https://doi.org/10.2807/1560-7917.ES.2020.25.10.2000180>
- [4] W. Guan et al., Clinical Characteristics of Coronavirus Disease 2019 in China, *New England Journal of Medicine*, (2020). Published on February 28, 2020, PMID: 32109013. <https://doi.org/10.1056/NEJMoa2002032>.
- [5] R. Li, S. Pei, B. Chen, Y. Song, T. Zhang, W. Yang and J. Shaman, Substantial undocumented infection facilitates the rapid dissemination of novel coronavirus (SARS-CoV2). *Science* (2020). <https://doi.org/10.1126/science.abb3221>
- [6] Z. Liu, P. Magal, O. Seydi and G. Webb, Understanding unreported cases in the 2019-nCov epidemic outbreak in Wuhan, China, and the importance of major public health interventions, *MPDI Biology*, **9(3)**, 50 (2020). <https://doi.org/10.3390/biology9030050>
- [7] Z. Liu, P. Magal, O. Seydi and G. Webb, Predicting the cumulative number of cases for the COVID-19 epidemic in China from early data, *Mathematical Biosciences and Engineering* **17(4)** (2020), 3040-3051. <https://doi.org/10.3934/mbe.2020172>
- [8] Z. Liu, P. Magal, O. Seydi and G. Webb, A COVID-19 epidemic model with latency period, *Infectious Disease Modelling (to appear)*.
- [9] Z. Liu, P. Magal, O. Seydi and G. Webb, A model to predict COVID-19 epidemics with applications to South Korea, Italy, and Spain, *SIAM News (to appear)*.
- [10] H. Nishiura et al., Estimation of the asymptomatic ratio of novel coronavirus infections (COVID-19), *International Journal of Infectious Diseases*, (2020). Published:March 13, <https://doi.org/10.1016/j.ijid.2020.03.020>.
- [11] J. Qiu, Covert coronavirus infections could be seeding new outbreaks, *Nature*, (2020). <https://www.nature.com/articles/d41586-020-00822-x>
- [12] C. Rothe et al., Transmission of 2019-nCoV infection from an asymptomatic contact in Germany, *New England Journal of Medicine*, (2020). <https://doi.org/10.1056/NEJMc2001468>
- [13] C. Wang et al., Evolving Epidemiology and Impact of Non-pharmaceutical Interventions on the Outbreak of Coronavirus Disease 2019 in Wuhan, China, *medRxiv*. <https://doi.org/10.1101/2020.03.03.20030593>
- [14] R. Wölfel et al., Virological assessment of hospitalized patients with COVID-2019, *Nature*, (2020). <https://doi.org/10.1038/s41586-020-2196-x>  
Wölfel, R., Corman, V.M., Guggemos, W. et al. Virological assessment of hospitalized patients with COVID-2019. *Nature* (2020). <https://doi.org/10.1038/s41586-020-2196-x>

- [15] The National Health Commission of the People's Republic of China [http://www.nhc.gov.cn/xcs/yqtb/list\\_gzbd.shtml](http://www.nhc.gov.cn/xcs/yqtb/list_gzbd.shtml)(accessed on 10 April 2020)
- [16] Chinese Center for Disease Control and Prevention. [http://www.chinacdc.cn/jkzt/crb/zl/szkb\\_11803/jszl\\_11809/](http://www.chinacdc.cn/jkzt/crb/zl/szkb_11803/jszl_11809/) (accessed on 10 April 2020)

## Figures

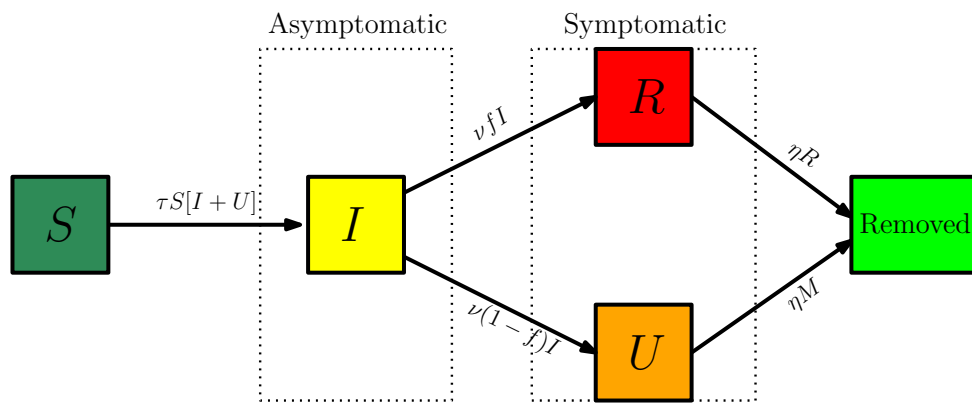

Figure 1: *Compartments and flow chart of the model (4.1).*

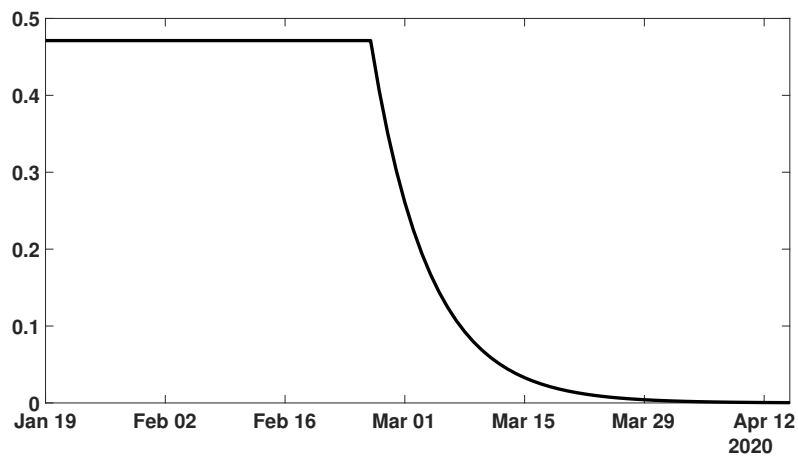

Figure 2: *Graph of  $\tau(t)S_0 = \tau_0 S_0 \exp(-\mu \max(t - N, 0))$  with  $S_0 = 1.40005 \times 10^9$ ,  $\tau_0 = 3.3655 \times 10^{-10}$ ,  $N = \text{Jan } 26$ , and  $\mu = 0.148$ . The transmission rate is effectively 0 after March 29. The parameters values correspond the line  $f = 0.8$  in Table 3.*

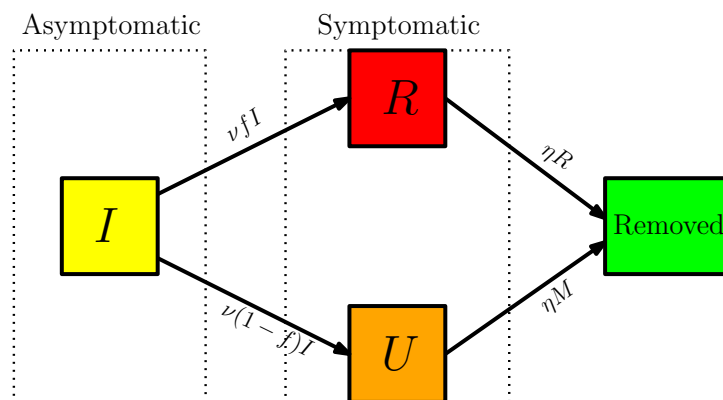

Figure 3: *Compartments and flow chart of the model (5.1).*

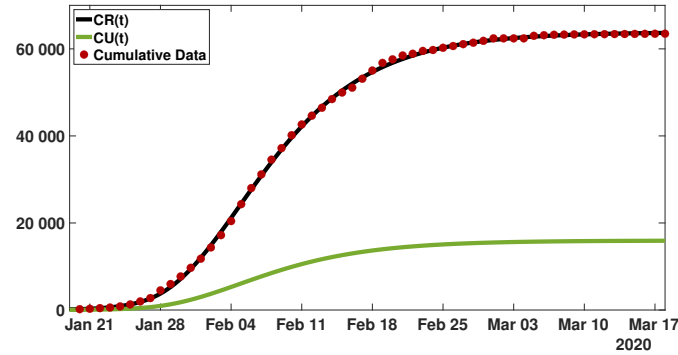

Figure 4: Comparison of the model with the data for mainland China. The parameter values are listed in Table 3 and  $f = 0.8$ .

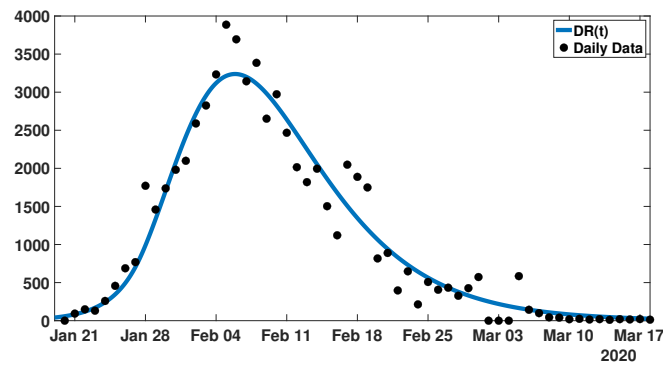

Figure 5: Comparison of the model with the daily data for mainland China. The parameter values are listed in Table 3 and  $f = 0.8$ .

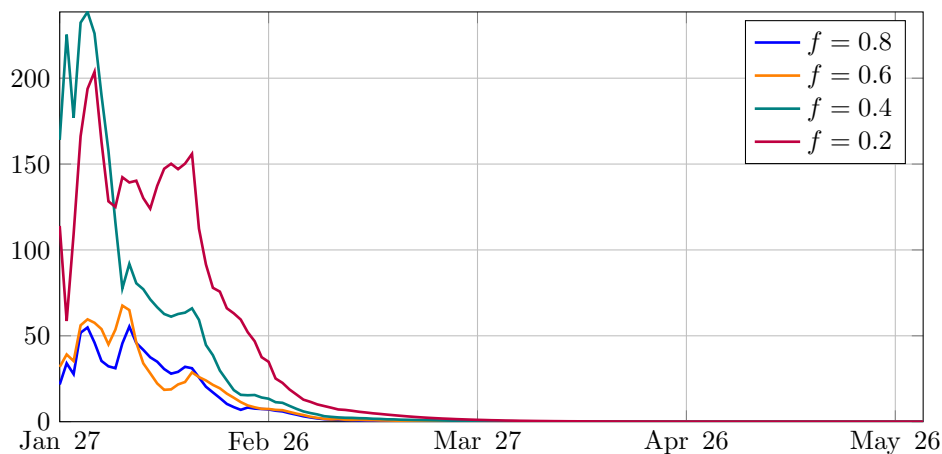

Figure 6: In this figure the x-axis corresponds to  $t_1$  and the y-axis corresponds to the error  $err(t_1)$  defined in (5.3). We observe that the smaller  $f$ , the larger the error. Parameter values are listed in Table 3.

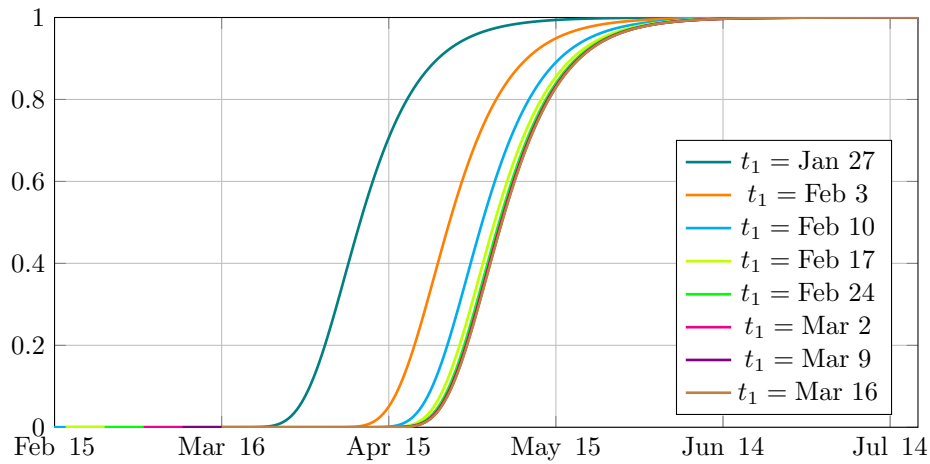

Figure 7: Extinction probability according to formula (5.4). The numerical values for  $I_1$  and  $U_1$  were computed from the ODE model at different times, at 7 days intervals since the start of the confinement measures. In this figure we use  $f = 0.8$  and other parameter values are listed in Table 3.

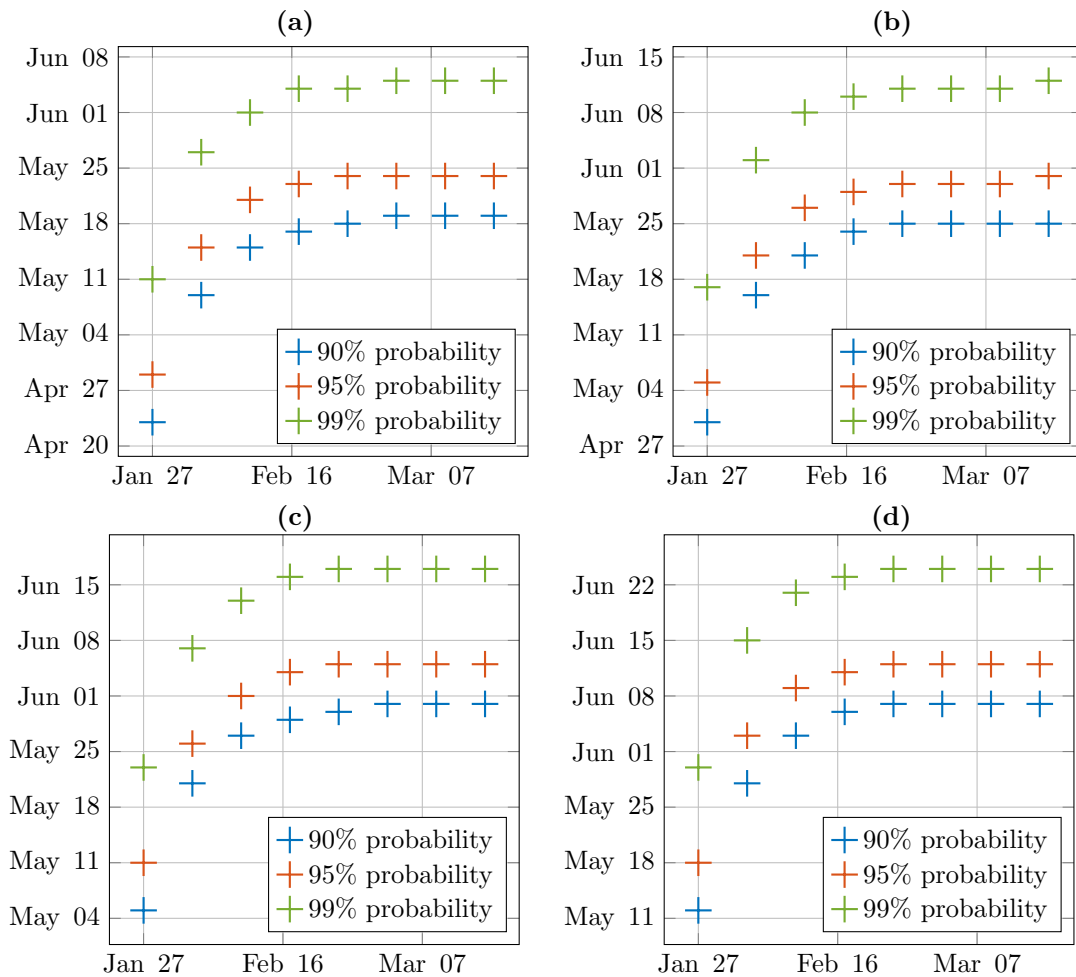

Figure 8: For each figure the x-axis corresponds to the day  $t_1$  and the y-axis corresponds to the dates of extinction of the disease at different probability level 90%, 95% and 99% computed by using (5.4). We fix  $f = 0.8$  in (a),  $f = 0.6$  in (b),  $f = 0.4$  in (c) and  $f = 0.2$  (d). The values of  $I_1$  and  $U_1$  are computed by solving (4.1) up to the time  $t = t_1$ . Parameter values are listed in Table 3.



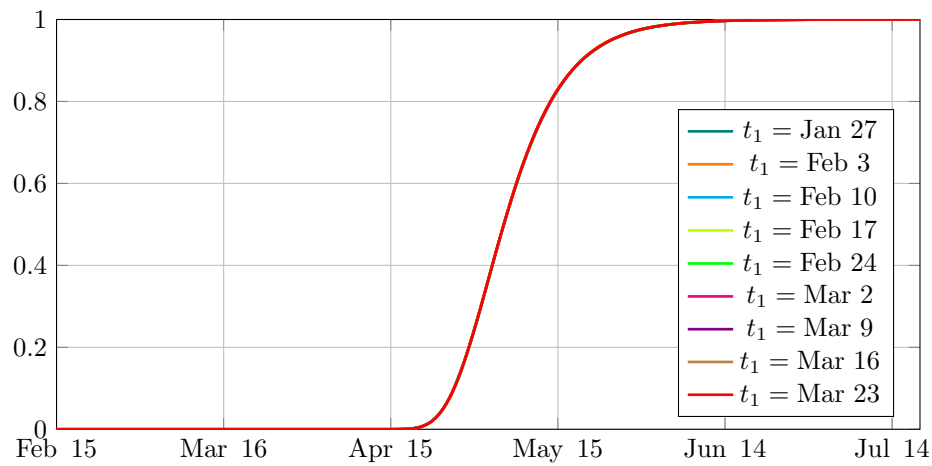

Figure 9: *Estimated cumulative probability distributions of the extinction date of the epidemic for different values of the starting point of the stochastic simulations. The red curve is the cumulative distribution corresponding to initial conditions started at  $t_1 = 82$  (March 23). The initial conditions were computed by rounding the solution to (4.1) at  $t = t_1$  to the nearest integer. The red curve is estimated with an error of at most  $10^{-3}$  at risk  $10^{-3}$  and other curves are estimated with an error of at most  $10^{-2}$  at a risk of  $10^{-3}$ . We took  $f = 0.8$  and other parameter values are shown in Table 3.*

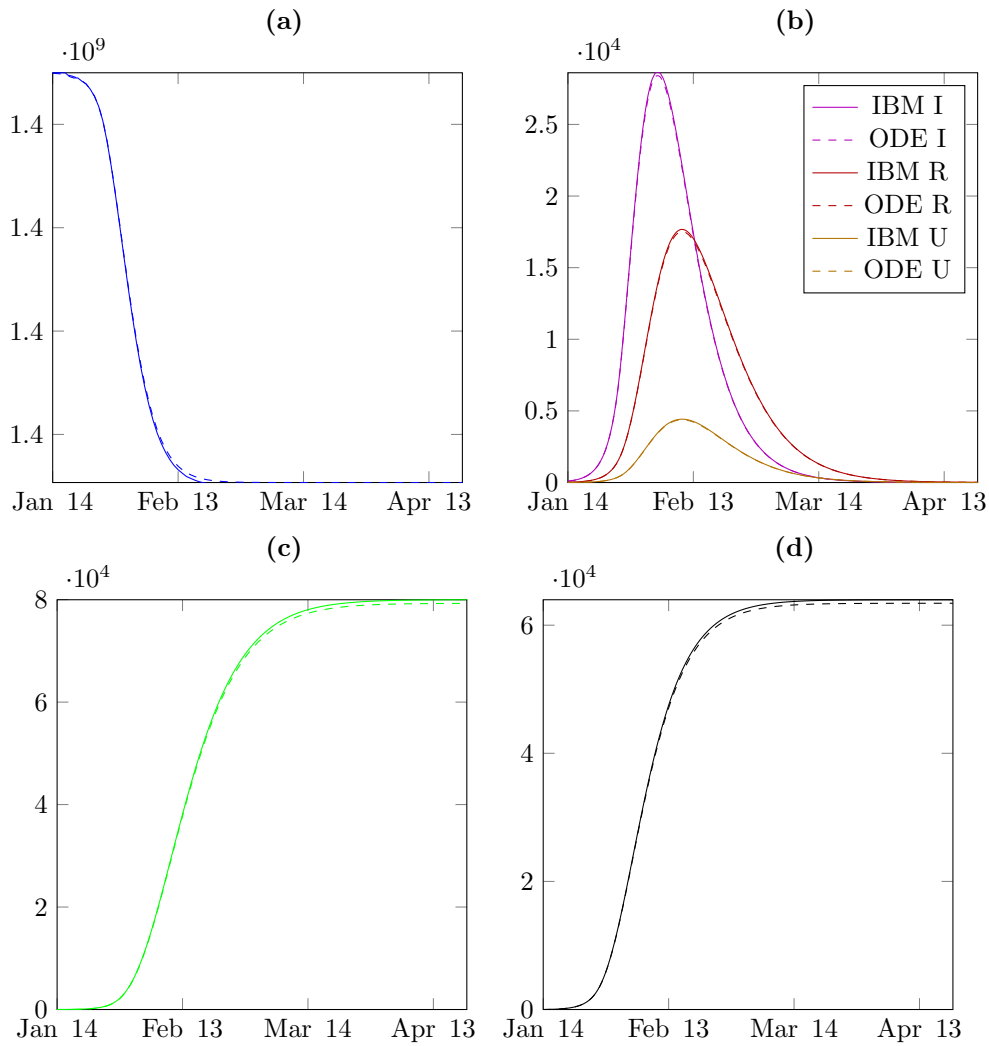

Figure 10: In figure (a) we plot a comparison between the average  $S$  (susceptible) computed from the IBM and the  $S$  component of the solution of (4.1). In figure (b) we plot a comparison between the average  $I$  (asymptomatic),  $R$  (reported) and  $U$  (unreported) computed from the IBM and the components  $I$ ,  $R$  and  $U$  of the solution of (4.1). In figure (c) we plot a comparison between the average  $RR$  (removed) computed from the IBM and the components  $RR$  of the solution of (4.1). In figure (d) we plot a comparison between the average  $CR$  (cumulative reported cases) computed from the IBM and the curve  $CR$  computed by (4.1)-(4.4). In this figure 500 independent runs of the IBM simulations are used and the corresponding components of the ODE model start from the same initial condition (at  $t = t_0$ ). The parameters we used for both computations are the following:  $I_0 = 93$ ,  $U_0 = 5$ ,  $S_0 = 1.40005 \times 10^9 - (I_0 + U_0)$ ,  $R_0 = RR_0 = CR_0 = 0$  and  $f = 0.8$ ,  $\tau_0 = 3.3655 \times 10^{-10}$ ,  $N = 26$ ,  $\mu = 0.148$ ,  $\nu = \frac{1}{7}$ ,  $\eta = \frac{1}{7}$ ,  $t_0 = 13.3617$ .

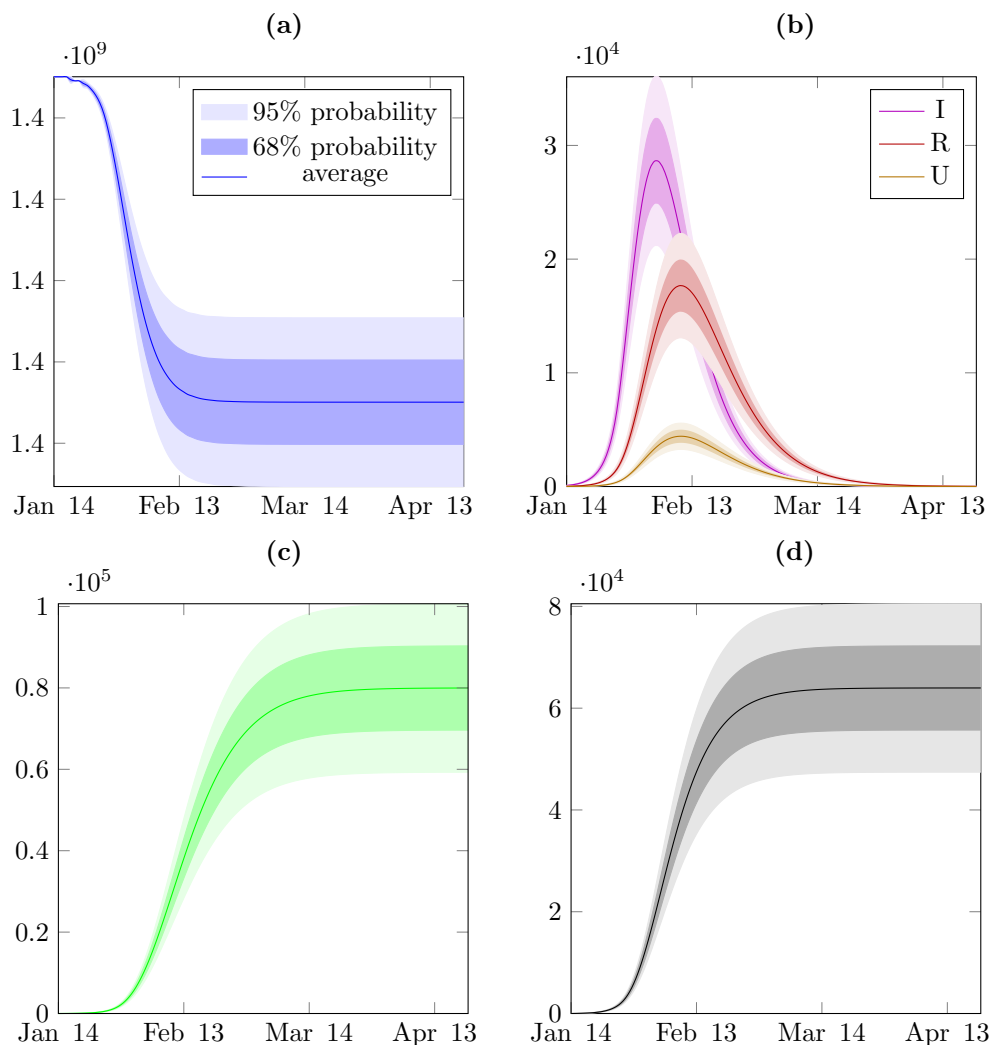

Figure 11: In figure (a) we plot the mean value and variance of  $S$  (susceptible) computed from the IBM. The dark blue area contains 68% of the trajectories, and the light blue area 95%. In figure (b) we plot the mean value and variance of  $I$  (infected),  $R$  (reported) and  $U$  (unreported) computed from the IBM. The dark areas contains 68% of the trajectories, and the light areas 95%. In figure (c) we plot the mean value and variance of  $RR$  (removed) computed from the IBM. The dark green area contains 68% of the trajectories, and the light green area 95%. In figure (d) we plot the mean value and variance of  $CR$  (cumulated reported) computed from the IBM. The dark gray area contains 68% of the trajectories, and the light gray area 95%. We use 500 independent runs of the IBM simulations. The parameters we used for both computations are the following:  $I_0 = 93$ ,  $U_0 = 5$ ,  $S_0 = 1.40005 \times 10^9 - (I_0 + U_0)$ ,  $R_0 = RR_0 = CR_0 = 0$  and  $f = 0.8$ ,  $\tau_0 = 3.3655 \times 10^{-10}$ ,  $N = 26$ ,  $\mu = 0.148$ ,  $\nu = \frac{1}{7}$ ,  $\eta = \frac{1}{7}$ ,  $t_0 = 13.3617$ .
